# Supplementary material
Source: PubMed Central journal article supplement (PMC9648694)
Supplement: NIHMS1837251-supplement-Supplementary_figures.pdf [file NIHMS1837251-supplement-Supplementary_figures.pdf]

**Figure S1 (related to Figure 1)**

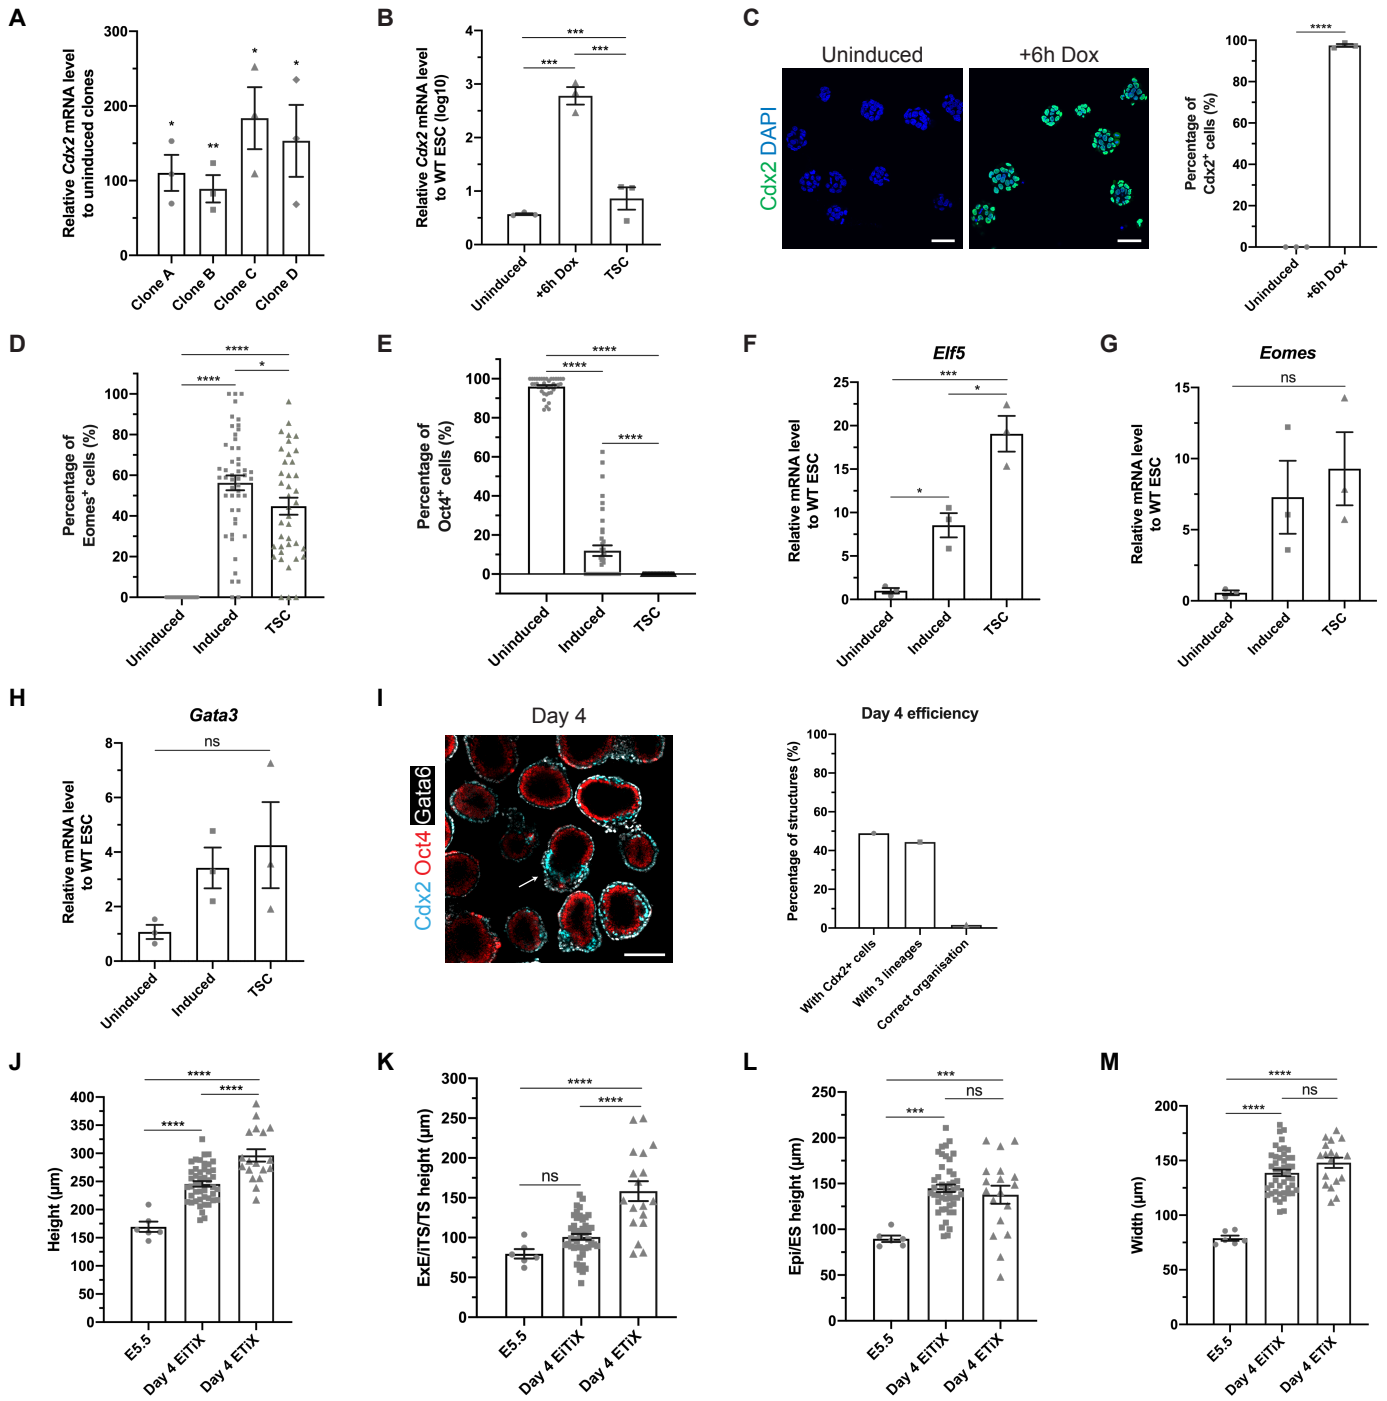

**Figure S1. Characterisation of *Cdx2* inducible cells and Day 4 EiTiX-embryoids, related to Figure 1.**

(A) Fold changes of *Cdx2* mRNA level in four different clones of i*Cdx2* ESCs 6 hours after Dox induction, determined by qRT-PCR. Student's t-test compares fold change with respect to uninduced counterparts. (B) Relative *Cdx2* mRNA levels in uninduced i*Cdx2* ESCs, 6-hour induced CAG i*Cdx2* ESCs, and TSCs as compared to unmodified ESCs. (C) Immunofluorescence images of *Cdx2* expression in uninduced and 6-hour induced i*Cdx2* ESCs. Percentage of *Cdx2*<sup>+</sup> cells is shown in righthand graph. n = 3 experiments, 5-10 random fields imaged for each condition in each experiment. Scale bar, 50µm. (D-E) Percentage of *Eomes*<sup>+</sup> (D) and *Oct4*<sup>+</sup> (E) cells in Day 3 aggregates of uninduced, induced i*Cdx2* ESCs and TSCs. (D) n = 43 uninduced aggregates, 50 induced aggregates and 39 TSC aggregates. (E) n = 40 uninduced aggregates, 40 induced aggregates and 43 TSC aggregates. (F-H) Relative mRNA levels of TSC markers *Elf5* (F), *Eomes* (G) and *Gata3* (H) in Day 3 aggregates, normalised to mRNA levels in unmodified ESC aggregates. (I) Day 4 structures generated using the ETiX embryo protocol, stained to reveal *Cdx2* (cyan), *Oct4* (red) and *Gata6* (white). Arrow indicates structure with correct organisation. Scale bar, 150µm. Graph shows percentages of structures with *Cdx2*-positive cells, with cells from all three lineages and with correct organisation. Scale bar, 150µm. (J-M) Size comparison of E5.5 mouse embryos, Day 4 EiTiX-embryoids and Day 4 ETiX embryos in terms of height (J), ExE/iTS/TS height (K), Epi/ES height (L) and width (M). n = 6 E5.5 mouse embryos, 46 Day 4 EiTiX-embryoids and 15 Day 4 ETiX embryos. All experiments were performed minimum 3 times with the exception of (I). Statistics: (A and C) Student's t-test. (B, D-H, J-M) One-way ANOVA followed by Bonferroni's multiple comparisons test. \*p < 0.05; \*\*p < 0.01; \*\*\*p < 0.001; \*\*\*\*p < 0.0001; ns, non-significant.

**Figure S2 (related to Figure 2)**

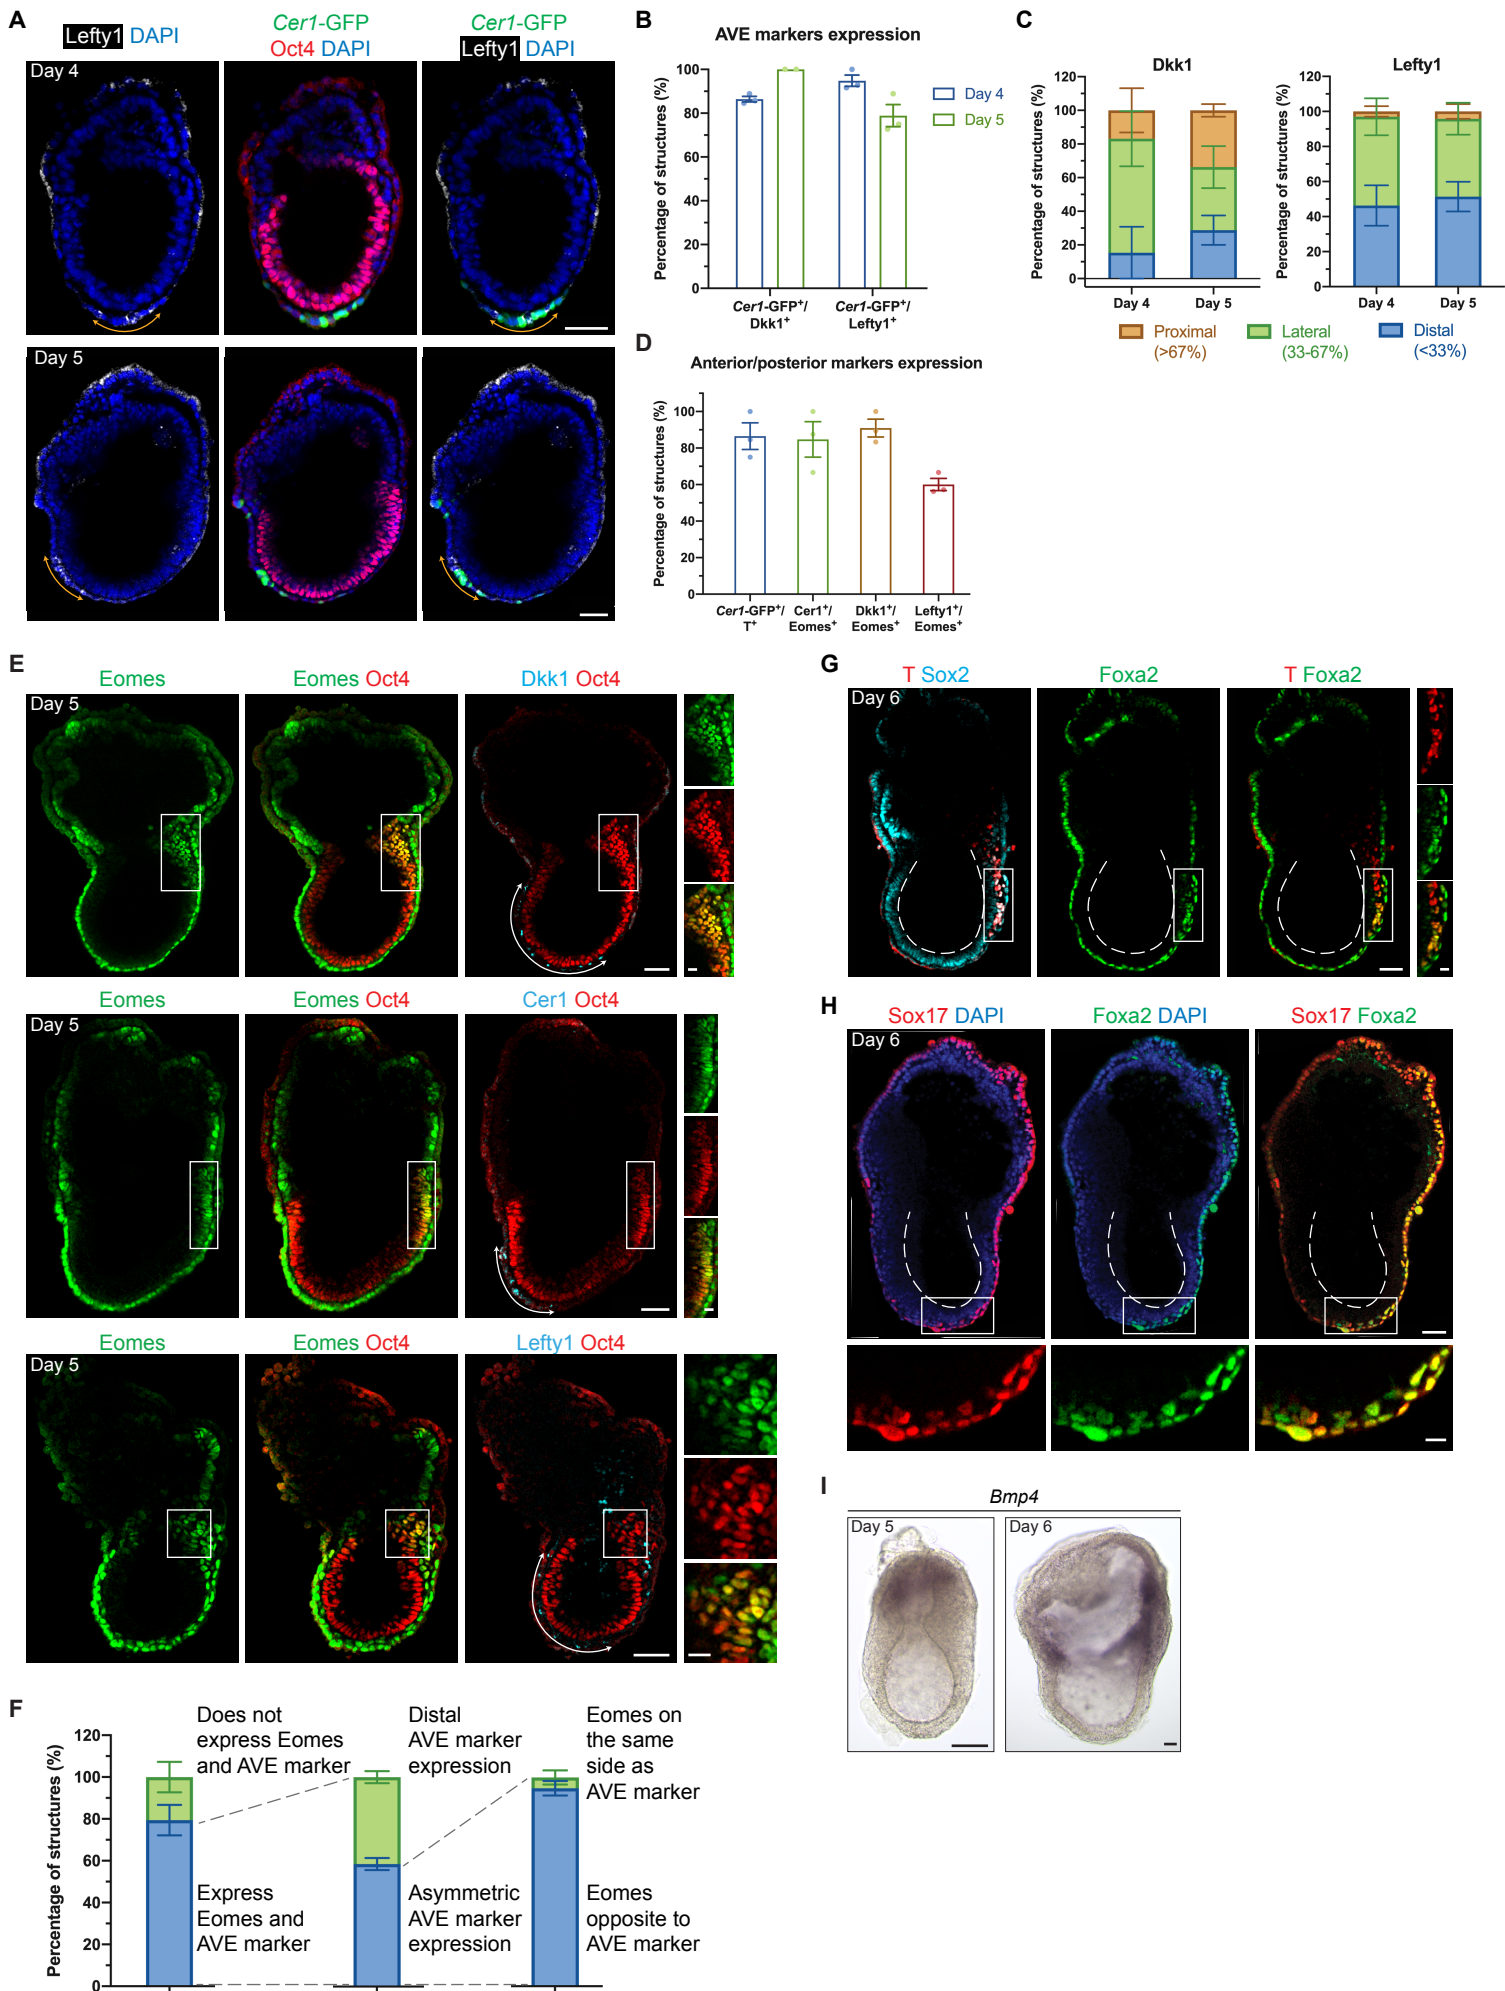

**Figure S2. EiTiX-embryoids establish an anterior-posterior axis and undergo gastrulation, related to Figure 2.**

(A) Day 4 and Day 5 EiTiX-embryoids stained to reveal *Cer1*-GFP (green), Oct4 (red) and Lefty1 (white). Arrows indicate the Lefty1-positive domain. (B) Percentages of EiTiX-embryoids expressing different combinations of AVE markers. n = 29-32 Day 4 EiTiX-embryoids and 18-28 Day 5 EiTiX-embryoids. (C) Localisation of Dkk1 and Lefty1 in Day 4 and Day 5 EiTiX-embryoids. See Materials and Methods for quantification method. Dkk1: n = 29 Day 4 EiTiX-embryoids, 18 Day 5 EiTiX-embryoids; Lefty1: n = 30 Day 4 EiTiX-embryoids, 22 Day 5 EiTiX-embryoids. (D) Percentages of EiTiX-embryoids expressing different combinations of anterior/posterior markers. n = 42 Day 5 EiTiX-embryoids (*Cer1*-GFP<sup>+</sup>/T<sup>+</sup>), 39 Day 5 EiTiX-embryoids (*Cer1*<sup>+</sup>/*Eomes*<sup>+</sup>), 37 Day 5 EiTiX-embryoids (*Dkk1*<sup>+</sup>/*Eomes*<sup>+</sup>) and 38 Day 5 EiTiX-embryoids (*Lefty1*<sup>+</sup>/*Eomes*<sup>+</sup>). (E) Day 5 EiTiX-embryoids stained for *Eomes* (green), Oct4 (red) and *Cer1* or *Dkk1* or *Lefty1* (cyan). Arrows indicate *Dkk1*- or *Cer1*- or *Lefty1*-positive domain while the box indicates *Dkk1*- or *Cer1*- or *Lefty1*- and *Eomes*- double positive domains. (F) Graph shows percentages of Day 5 EiTiX-embryoids with 1) AVE marker and *Eomes* expression, 2) asymmetric AVE marker expression, and 3) *Eomes* expression on the opposite side to AVE. n = 114 EiTiX-embryoids. (G) Day 6 EiTiX-embryoid stained to reveal T (red) and *Foxa2* (green). Box indicates T- and *Foxa2*-double positive domain; white dotted lines, lumen of ES compartment. n = 15/16 EiTiX-embryoids with T- and *Foxa2*- double positive cells. (H) Day 6 EiTiX-embryoid stained to reveal *Foxa2* (green) and *Sox17* (red). Box, *Foxa2*- and *Sox17*- double positive domain; dotted lines, lumen of ES compartment. n = 15/17 EiTiX-embryoids with *Foxa2*- and *Sox17*-double positive cells. (I) Whole mount *in situ* hybridisation to reveal *Bmp4* in Day 5 and Day 6 EiTiX-embryoids. n = 9/10 Day 5 EiTiX-embryoids and 13/15 Day 6 EiTiX-embryoids. All experiments were performed minimum 2 times. Scale bars: 50µm, 15µm (zoomed).

**Figure S3 (Related to Figure 3)**

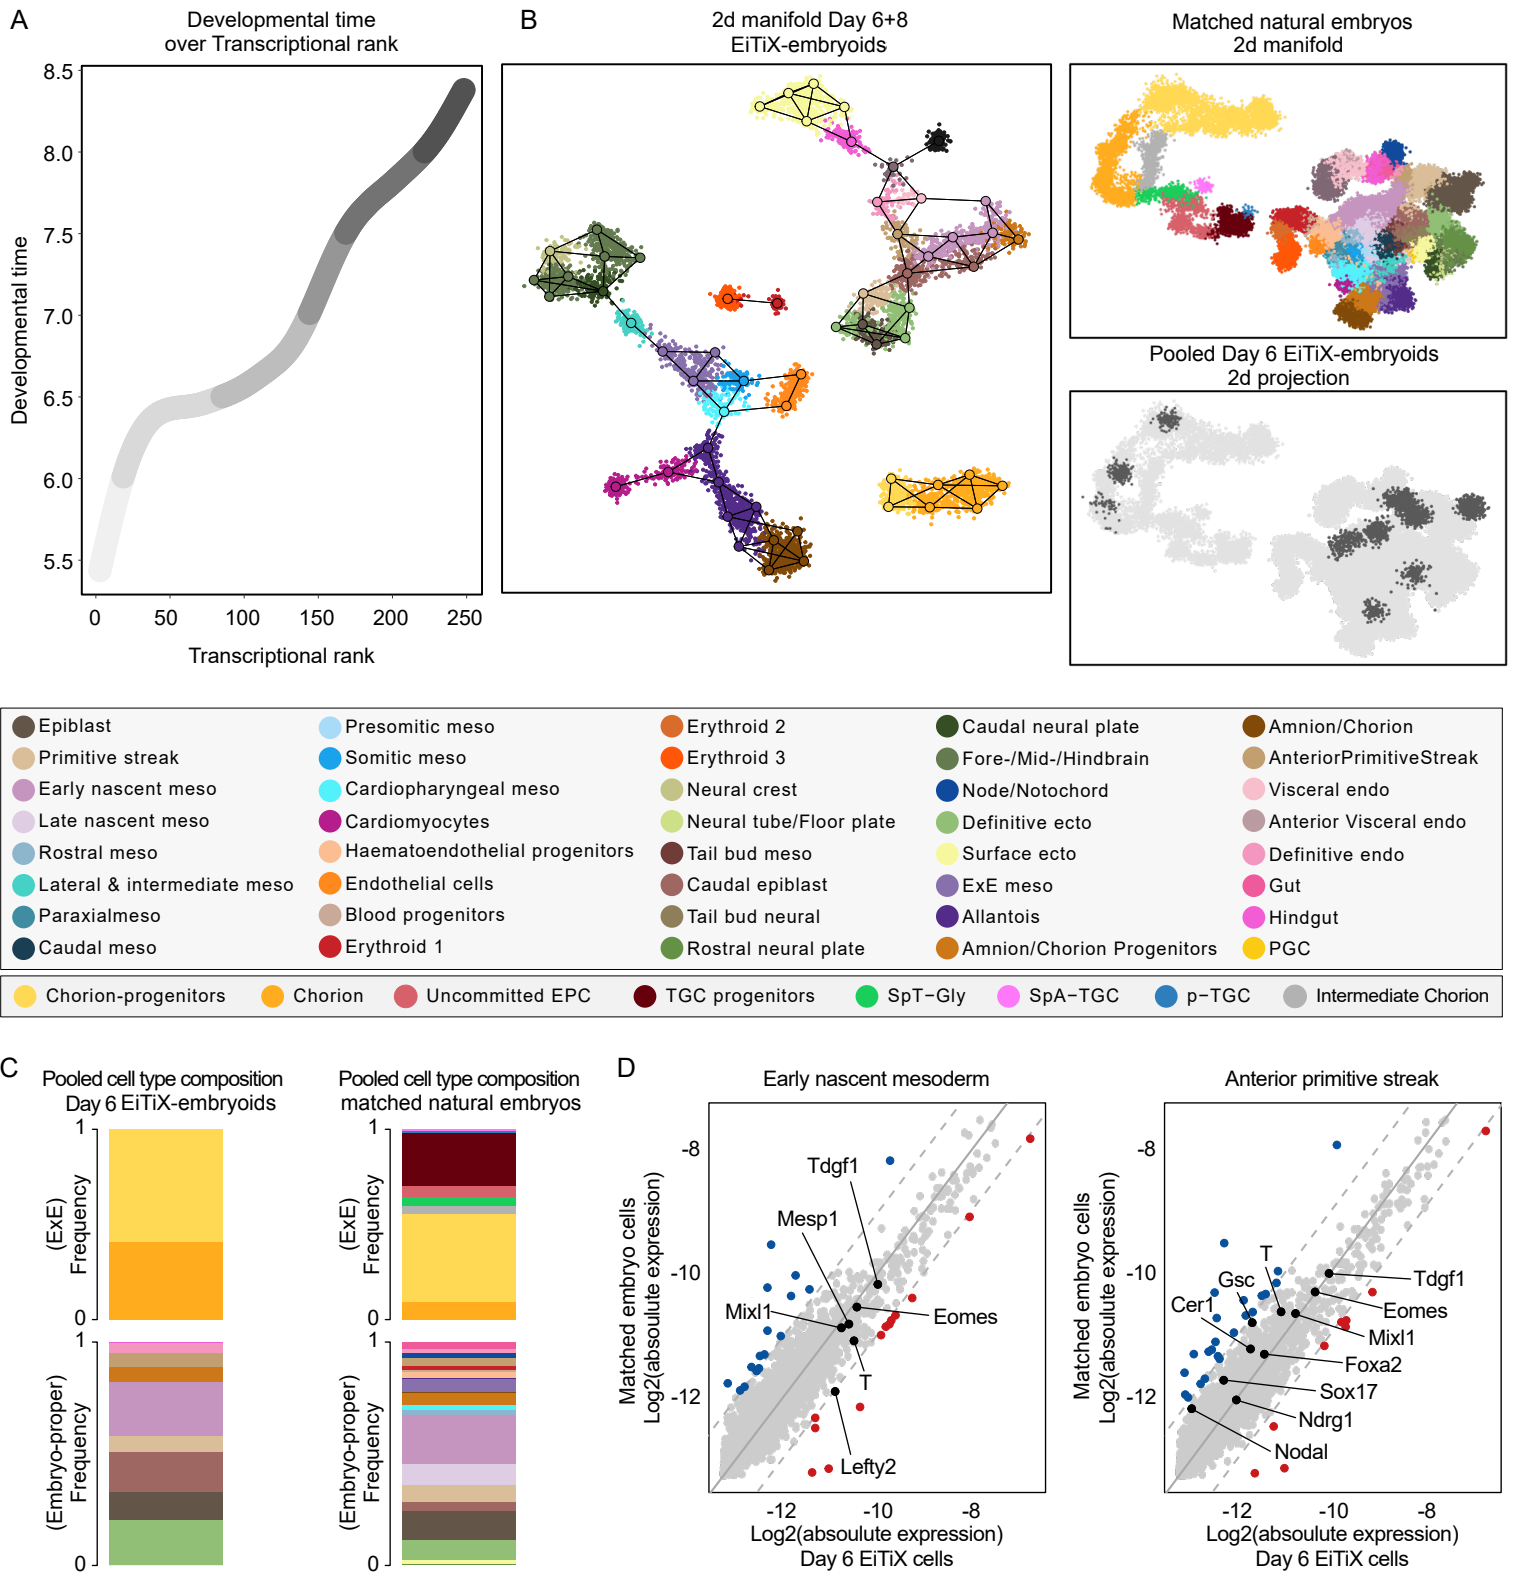

**Figure S3. Day 6 EiTiX-embryoids capture major cell types of gastrulation, related to Figure 3.**

(A) Developmental time ( $E_t$ ) over embryo rank, annotated by age group (in  $1E_t - 1.5E_t$  intervals, legend in Fig. 3C). (B) Day 6 and 8 EiTiX combined manifold, single cells (small dots) and Metacells (big dots) annotated by cell state (legend below). Right panels show manifold of matched natural embryos and projection of pooled Day 6 EiTiX-embryoids on the manifold. (C) Pooled ExE (top) and embryonic (bottom) cell-state frequencies of Day 6 EiTiX-embryoids (left panel) and time-matched natural embryos (right panel). (C) Bulk differential gene expression per cell state of Day 6 EiTiX cells against matched embryo cells; early nascent mesoderm (left) and anterior primitive streak (right). Dots represent individual genes. Colour annotated dots mark genes with a two-fold change in expression (blue – above two-fold decrease in Day 6 EiTiX cells, red – above two-fold increase in Day 6 EiTiX cells).

**Figure S4 (related to Figure 4)**

**A**

Day 8 EiTIX-embryoid

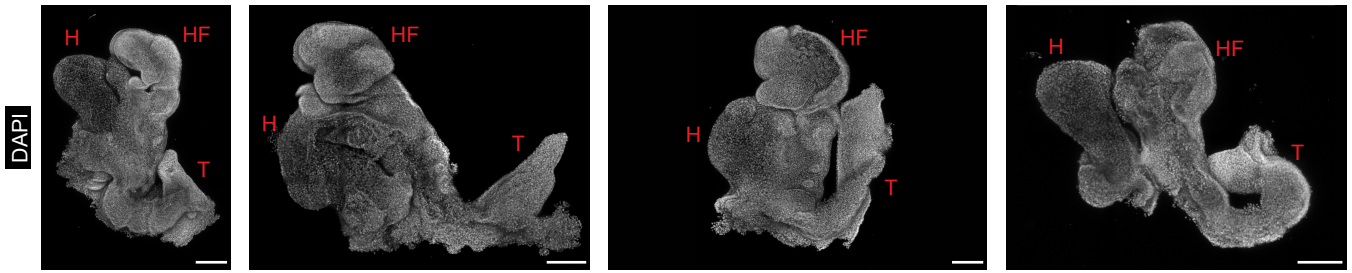

**B**

Underdeveloped Day 8 structure

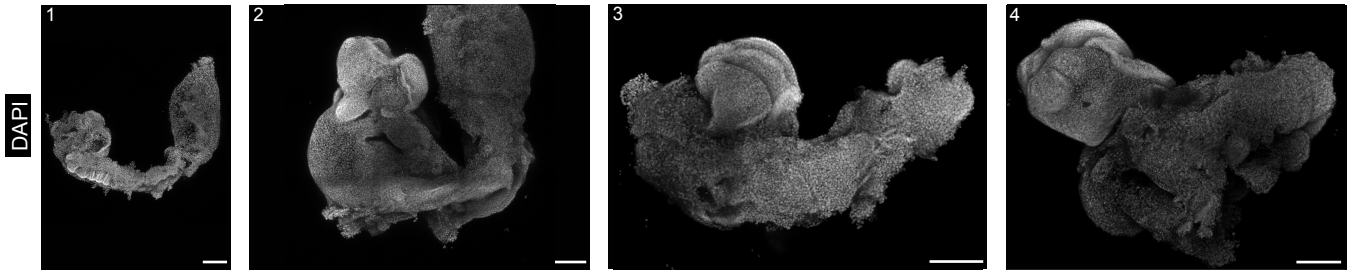

**C**

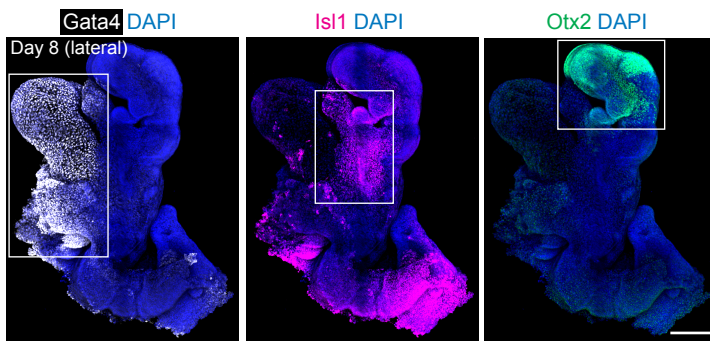

**D**

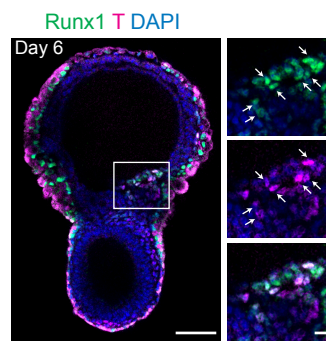

**E**

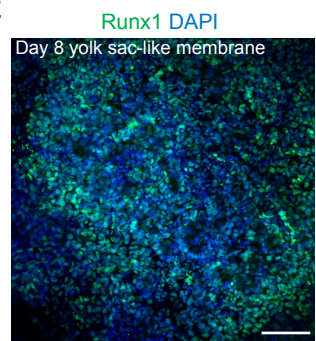

**Figure S4. EiTiX-embryoids develop to late headfold stages with heart and chorion development, related to Figure 4.**

Examples of DAPI stained Day 8 EiTiX-embryoids (**A**) and underdeveloped Day 8 structures (**B**). Underdeveloped Day 8 structures showed stunted overall development (1) or impaired axial elongation to generate posterior structures (2-4). H: heart, HF: headfolds, T: tail. Scale bar: 200 $\mu$ m. (**C**) Lateral view of Day 8 EiTiX-embryoid stained to reveal heart marker Gata4 (white), pharyngeal mesoderm marker Isl1 (magenta), and forebrain marker Otx2 (green). Scale bar, 200 $\mu$ m. (**D**) Day 6 EiTiX-embryoid stained to reveal Runx1 (green) and T (magenta). Arrow, Runx1- and T- double positive cells. n = 3/4 EiTiX-embryoids with Runx1- and T- double positive cells. Scale bar: 100 $\mu$ m, 20 $\mu$ m (zoomed). (**E**) Dissected yolk sac-like membrane from Day 8 EiTiX-embryoid stained to reveal Runx1 (green). n = 6/6 EiTiX-embryoids with Runx1 expression. Scale bar, 100 $\mu$ m.



**Figure S5 (Related to Figure 5)**

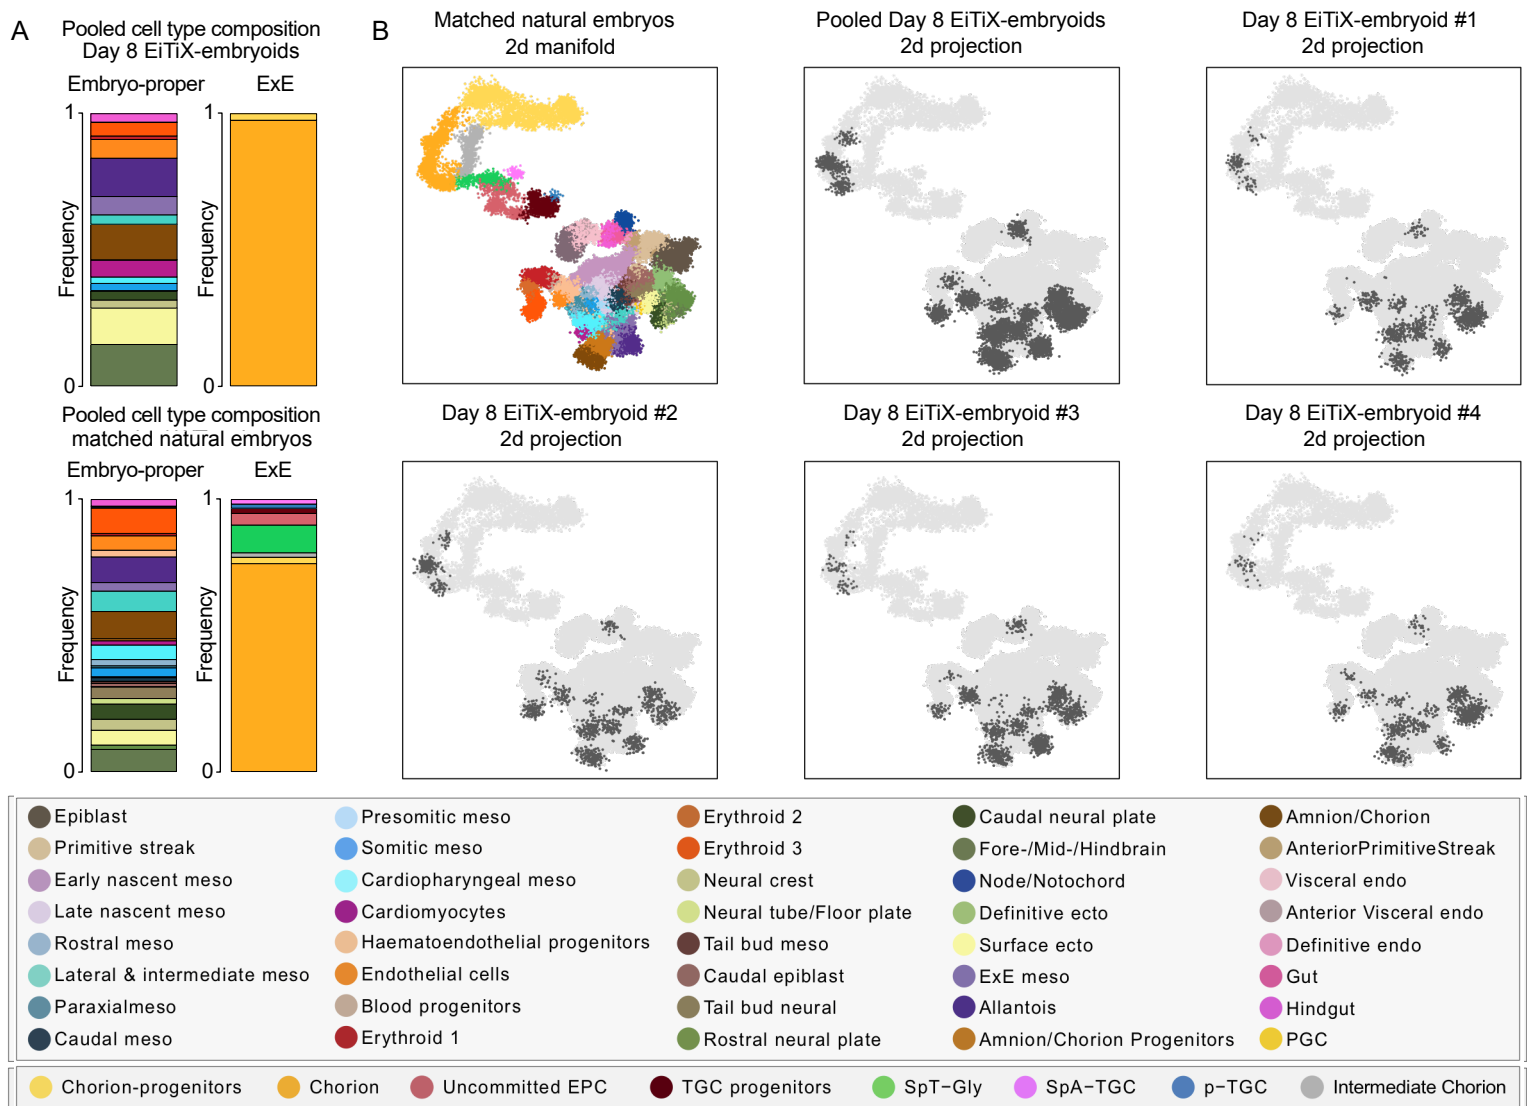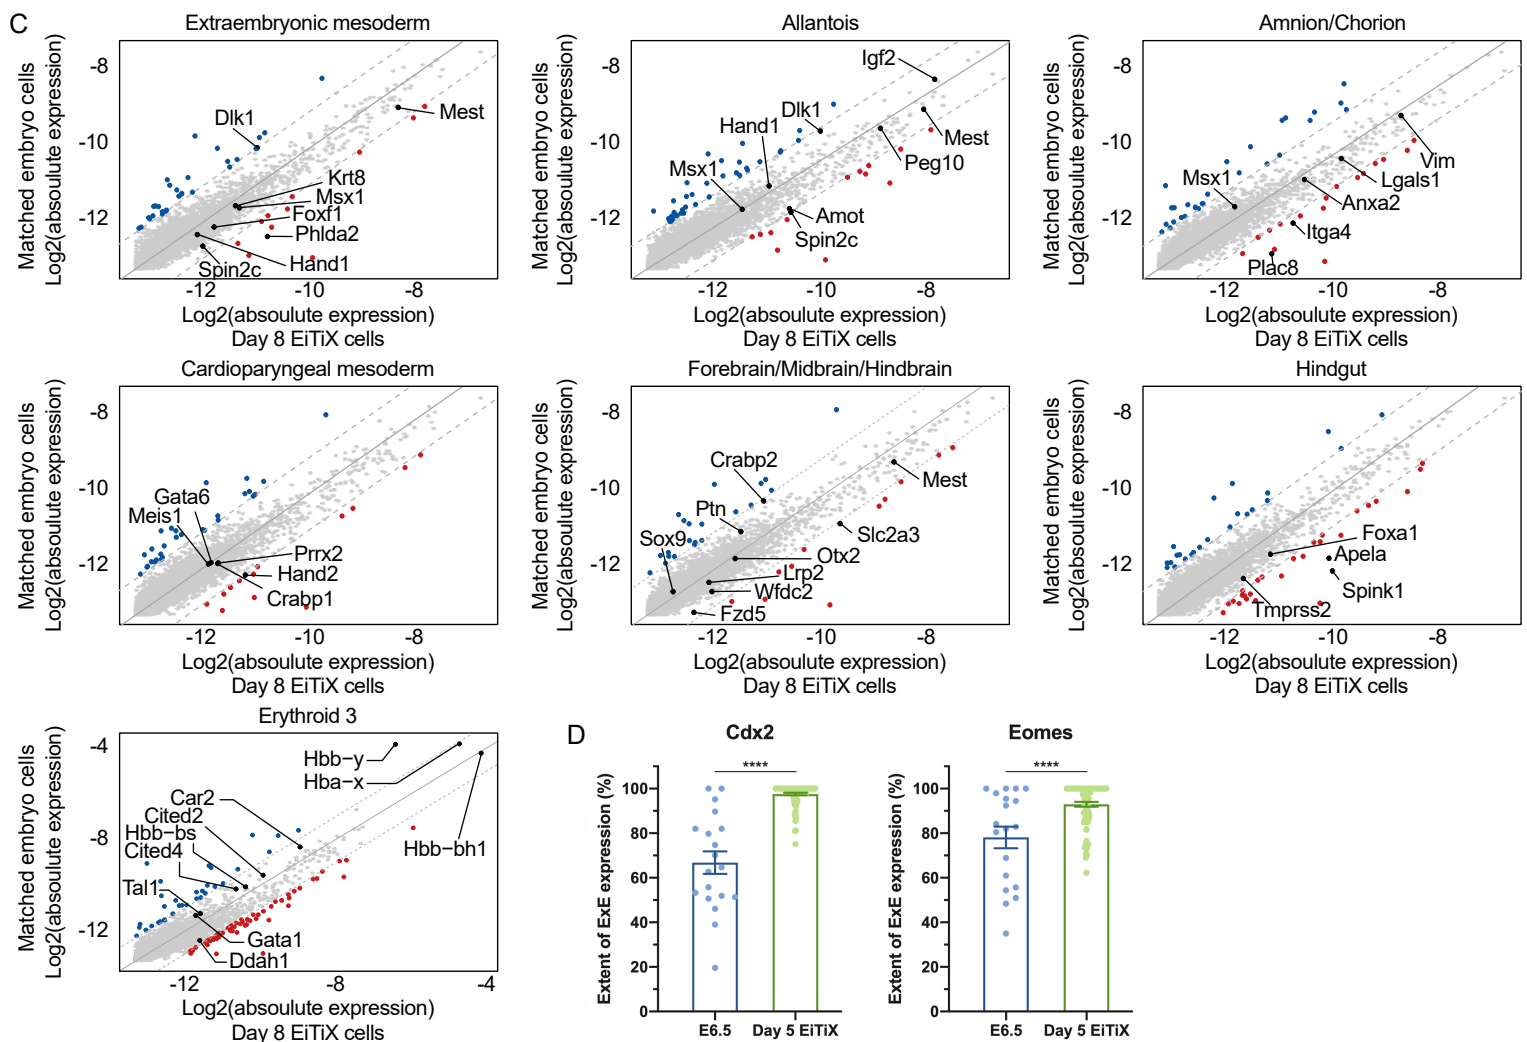

**Figure S5. Cell state and composition analysis of neurulating embryoids using scRNA-seq, related to Figure 5.**

(A) Pooled ExE (left bar) and embryonic (right bar) cell-state frequencies of Day 8 EiTiX structures (left panel) and time-matched natural embryos (right panel, annotated according to the legend below). (B) Manifold of matched natural embryos and projection of individual Day 8 EiTiX-embryoids on the manifold. (C) Bulk differential gene expression per cell state of Day 8 EiTiX cells against matched embryo cells (extraembryonic mesoderm, allantois, amnion/chorion, cardiopharyngeal mesoderm, forebrain/midbrain/hindbrain, hindgut and erythroid 3). Dots represent individual genes. Colour annotated dots mark genes with a two-fold change in expression (blue – above two-fold decrease in Day 8 EiTiX cells, red – above two-fold increase in Day 8 EiTiX cells). (D) Quantification of the extent of ExE expression *Cdx2* and *Eomes* in E6.5 embryos and Day 5 EiTiX-embryoids. n = 19 E6.5 embryos from 2 experiments and 78 Day 5 EiTiX-embryoids from 3 experiments; \*\*\*\*p < 0.0001.
